# Supplementary material for: Green Synthesis of Gold Nanoparticles Using Carrageenan Oligosaccharide and Their In Vitro Antitumor Activity
Source: PubMed Central journal article supplement (PMC6117638; doi:10.3390/md16080277), 2018-08-07
Supplement: marinedrugs-16-00277-s001.pdf [file marinedrugs-16-00277-s001.pdf]

**Figure S1**

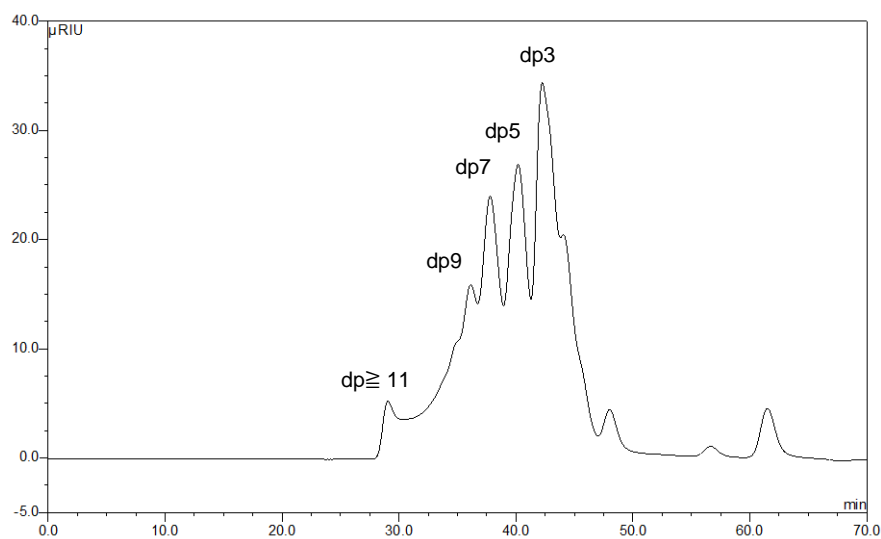

**Figure S1.** The elution profile of CAO by a Shodex OHpak SB-802.5 HQ column.

**Figure S2**

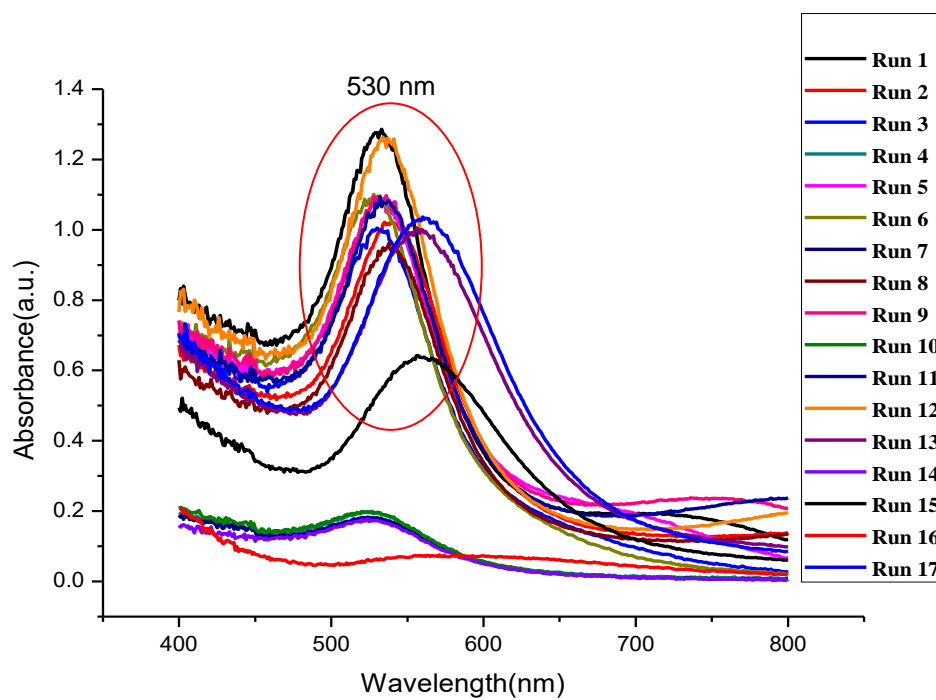

**Figure S2.** UV-vis spectra of the 17 groups in RSM experiments.

**Figure S3**

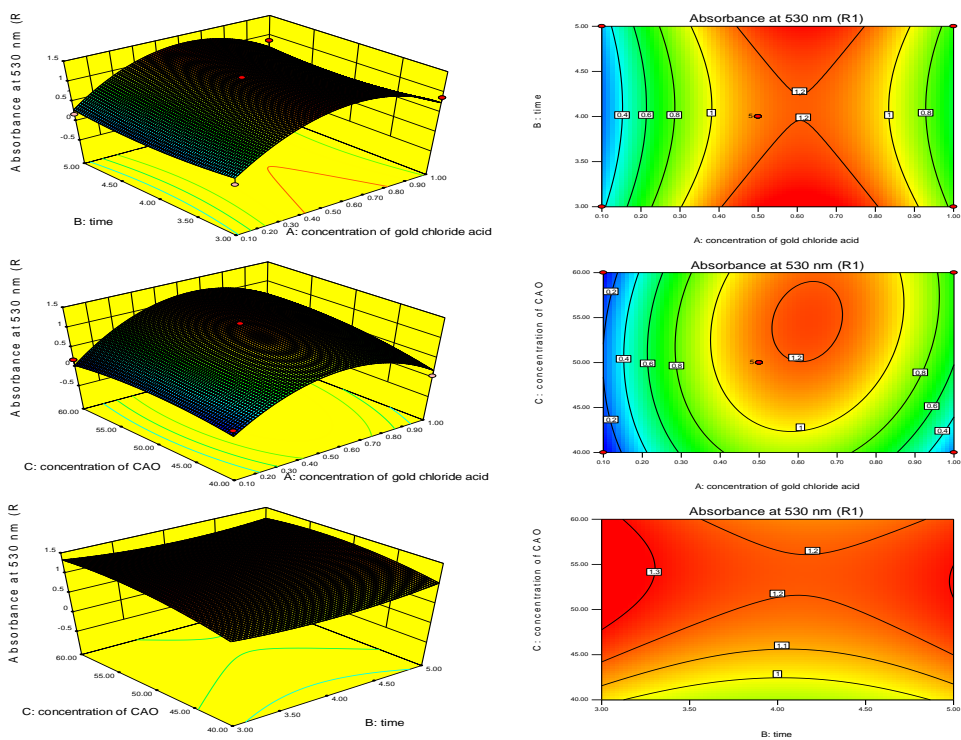

**Figure S3.** Response surface plot and contour plot of effects on synthetic conditions of AuNPs.

**Figure S4**

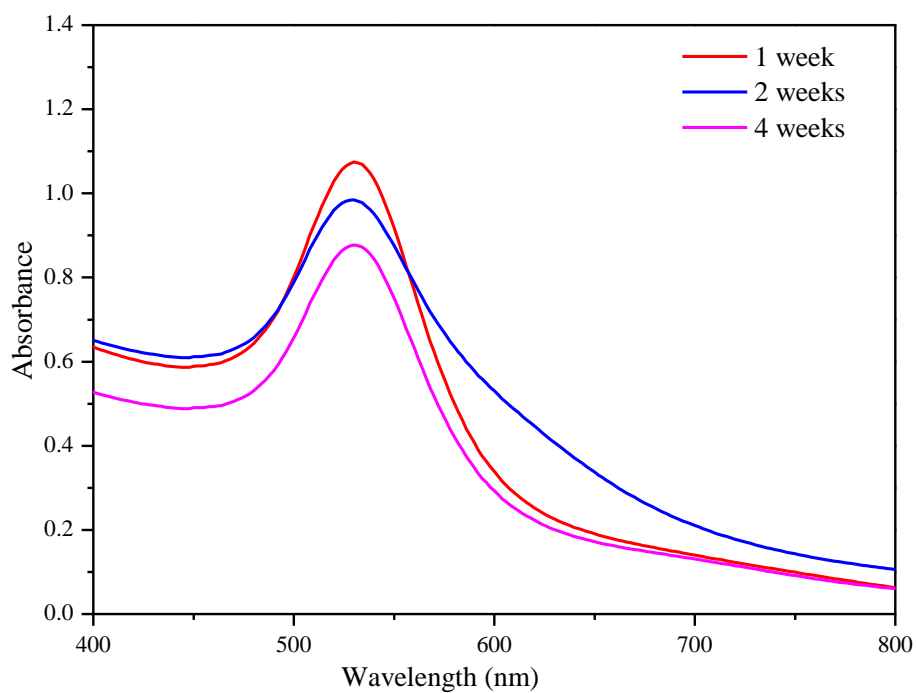

**Figure S4.** UV-vis spectra of CAO-AuNPs of four weeks stability at different times.

**Figure S5**

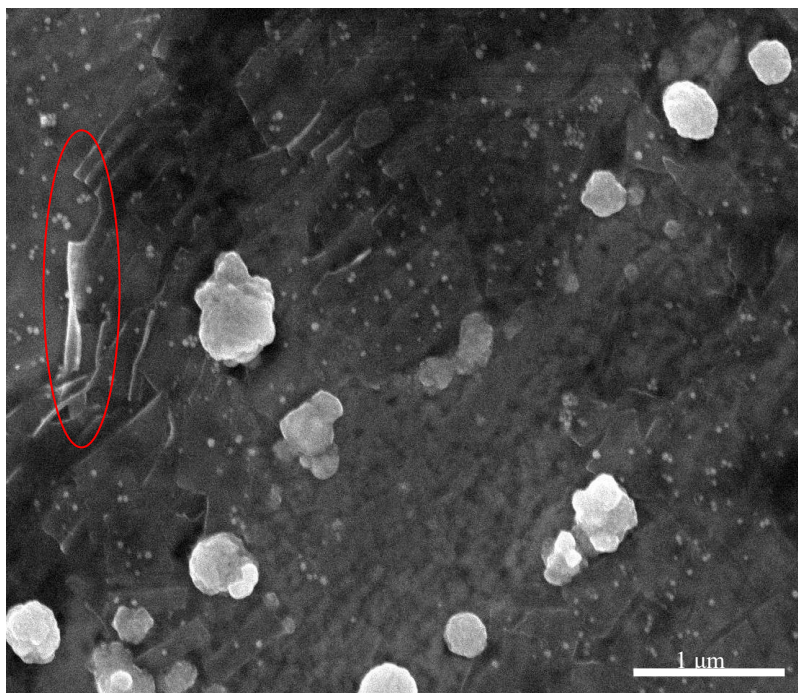

**Figure S5.** Electron microscopy characterization of CAO-AuNPs, SEM image of CAO-AuNPs.

**Figure S6**

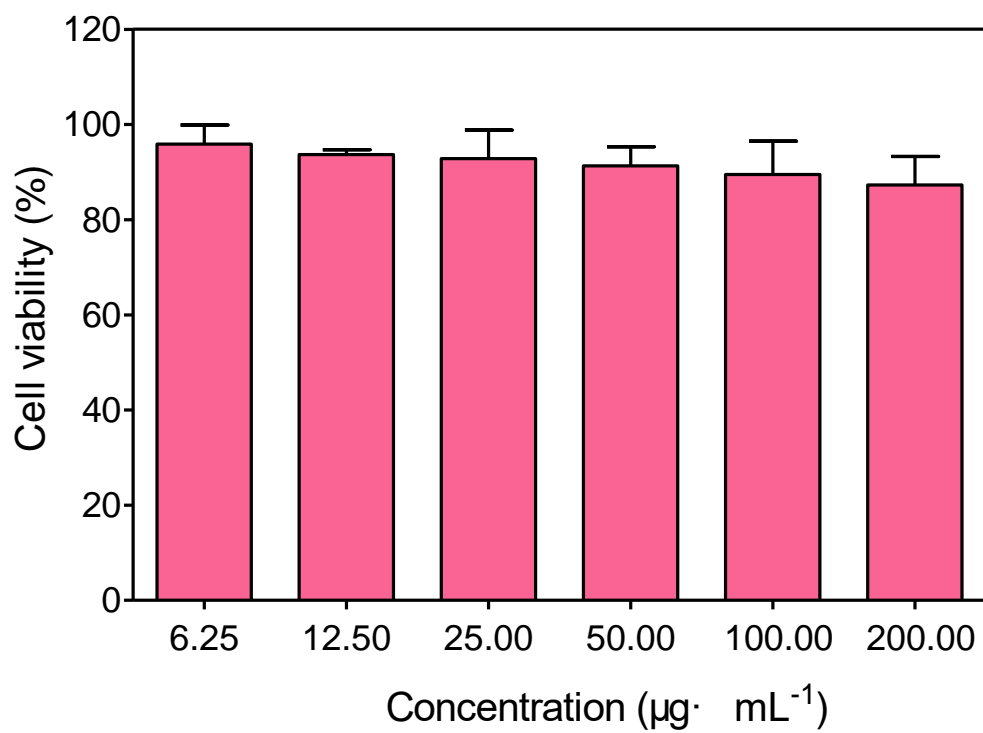

**Figure S6.** Cell viability assay of CAO-AuNP on HUVEC cells at different concentrations (6.25-200.00 µg/mL) for 72 h by the SRB.
